# Supplementary material for: Perfluorinated gelators for solidifying fluorous solvents: effects of chain length and molecular chirality
Source: Royal Society of Chemistry journal article supplement (doi:10.1039/c5ra12656h), 2015-01-01
Supplement: c5ra12656h1.pdf [file c5ra12656h1.pdf]

## Supporting Information

### Perfluorinated Gelators for Solidifying Fluorous Solvents :

#### Effects of Chain Length and Molecular Chirality

Tomoko Yajima,<sup>a</sup> Erika Tabuchi,<sup>a</sup> Emiko Nogami<sup>a</sup>, Akihiko Yamagishi<sup>b</sup> and Hisako Sato<sup>\*c</sup>

<sup>a</sup>*Graduate School of Humanities and Sciences, Ochanomizu University, Tokyo 112-8610, Japan.*

<sup>b</sup>*Department of Chemistry, Toho University, Funabashi, Chiba 274-8510, Japan .*

<sup>c</sup>*Graduated School of Science and Engineering, Ehime University, Matsuyama, Ehime 790-8577, Japan. Fax: +81-89-927-9599; Tel: +81-89-927-9590; E-mail: sato.hisako.my@ehime-u.ac.jp*

1. DSC data of gelators.
2. SEM images of xelogels.
3. Crystallographic data from single crystal X-ray analyses.
4. Sol-gel transition temperature.
5. The effect of optical purity on sol-gel temperature.
6. Photographs of the inversion tests of the gels.
7. HPLC Chart of gelators.

1. DSC data of gerators:

The results of differential scanning calorimetry for *SS-CF4*, *SS-CF5*, *SS-CF6*, *SS-CF9* and *SS-CF10*. DSC measurements were carried out with a DSC 3100SA (Buruker). Heating runs were performed at a scan rate of 5 °Cmin<sup>-1</sup>.

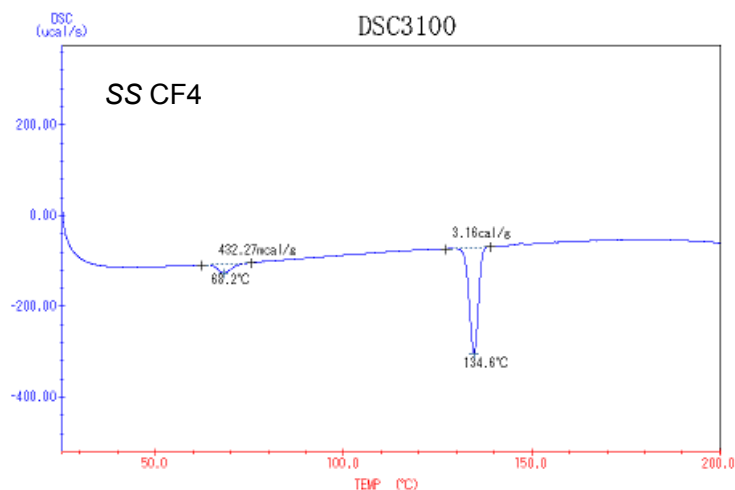

Fig. S1-1. The results of DSC for *SS-CF4*.

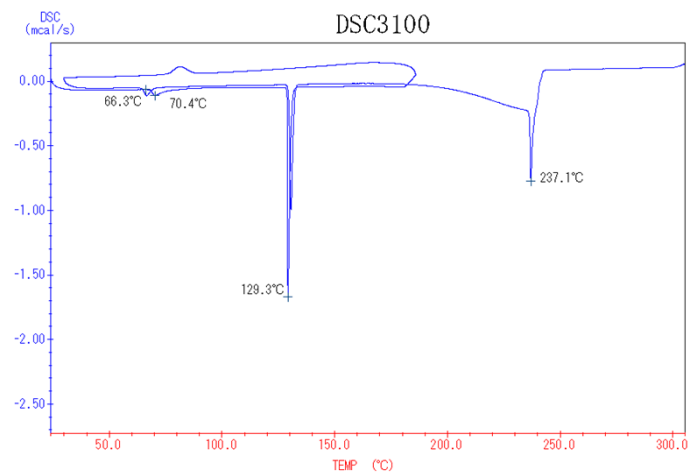

Fig. S1-2. The results of DSC for *SS-CF4* (Almost the same peaks were found in 1<sup>st</sup> and 2<sup>nd</sup> Cycle. Decomposition at 237 °C)

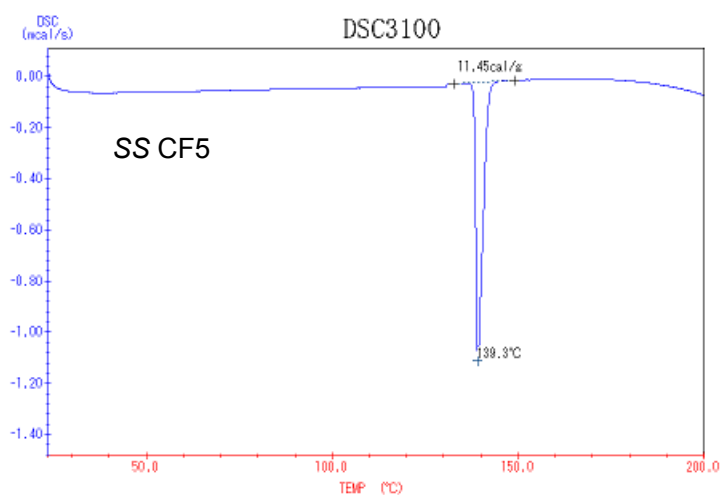

Fig. S1-3. The results of DSC for SS-CF5.

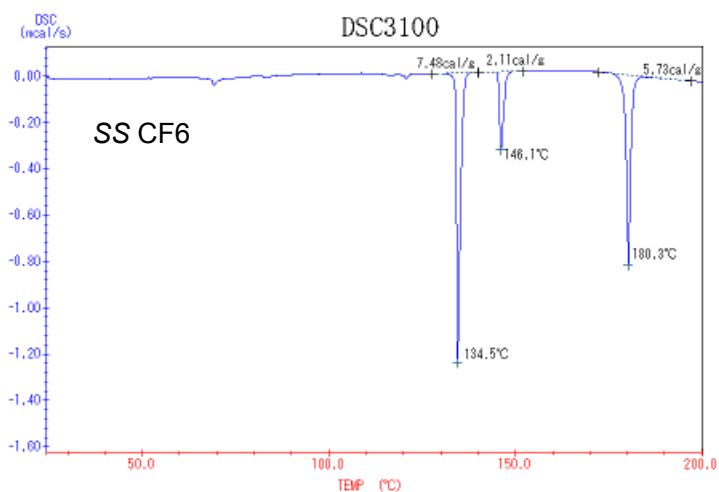

Fig. S1-4. The results of DSC for SS-CF6.

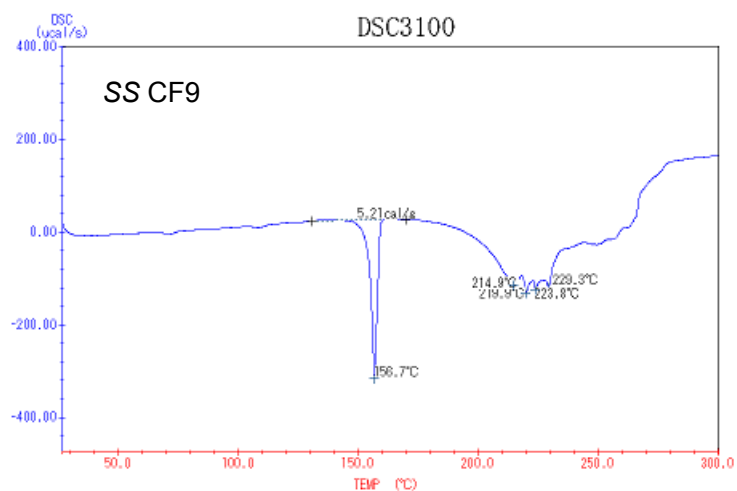

Fig. S1-5. The results of DSC for SS-CF9.

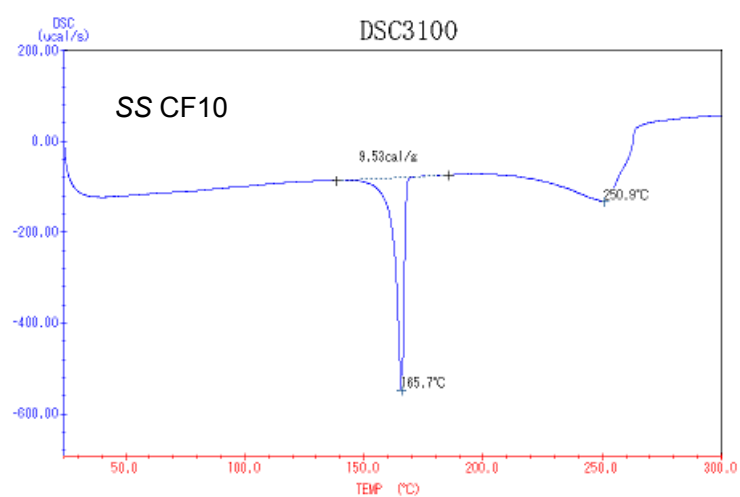

Fig. S1-6. The results of DSC for *SS-CF10*.

2. SEM images of gelators.

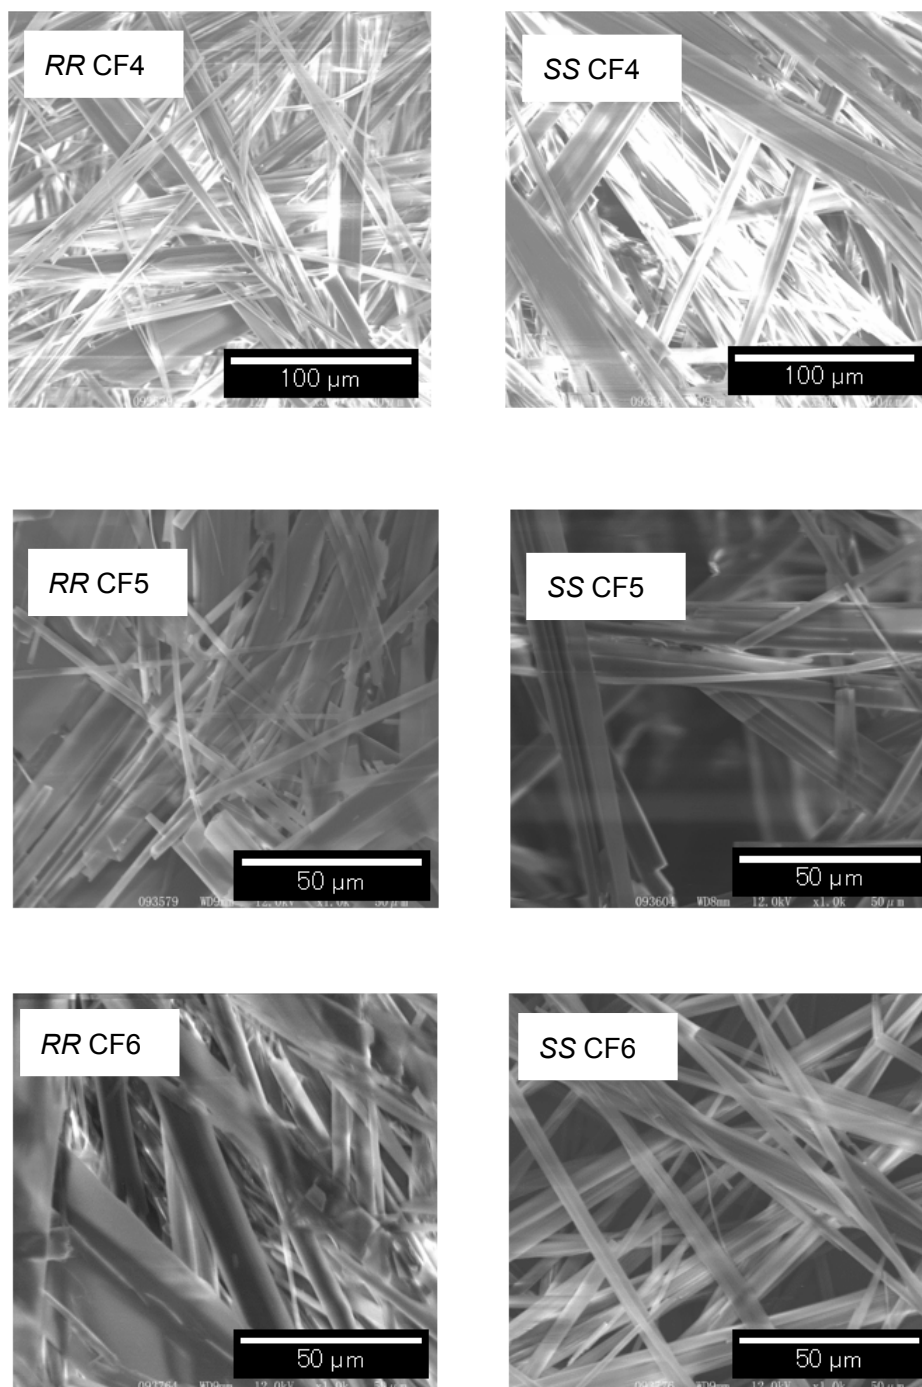

Fig. S2 The SEM images of xerogels from  $C_6F_6$  (CF4, CF5, CF6).

### 3. Crystallographic data from single crystal X-ray analyses

**Table S3.** Crystallographic data of *RR*-CF4 and racemic- CF4.

|                                                                                         |                 |                |
|-----------------------------------------------------------------------------------------|-----------------|----------------|
| Compound reference                                                                      | <i>RR</i> -C4F  | racemi-C4F     |
| Chemical formula                                                                        | C14H12F14N2O2   | C14H12F14N2O2  |
| Formula Mass                                                                            | 506.26          | 506.24         |
| Crystal system                                                                          | Monoclinic      | Orthorhombic   |
| <i>a</i> /Å                                                                             | 5.0662(7)       | 18.5495(14)    |
| <i>b</i> /Å                                                                             | 16.484(2)       | 21.0121(16)    |
| <i>c</i> /Å                                                                             | 10.9207(14)     | 9.5700(7)      |
| $\alpha$ /°                                                                             | 90.00           | 90.00          |
| $\beta$ /°                                                                              | 100.049         | 90.00          |
| $\gamma$ /°                                                                             | 90.00           | 90.00          |
| Unit cell volume/Å <sup>3</sup>                                                         | 898.0(2)        | 3730.0(5)      |
| Temperature/K                                                                           | 93(2)           | 93.15          |
| Space group                                                                             | <i>P</i> 1 21 1 | <i>P</i> c c n |
| No. of formula units per unit cell, <i>Z</i>                                            | 2               | 8              |
| Radiation type                                                                          | MoK $\alpha$    | MoK $\alpha$   |
| Absorption coefficient, $\mu$ /mm <sup>-1</sup>                                         | 0.221           | 0.213          |
| No. of reflections measured                                                             | 4732            | 27365          |
| No. of independent reflections                                                          | 2671            | 5725           |
| <i>R</i> <sub>int</sub>                                                                 | 0.0267          | 0.0331         |
| Final <i>R</i> <sub>1</sub> values ( <i>I</i> > 2 $\sigma$ ( <i>I</i> ))                | 0.0357          | 0.0418         |
| Final w <i>R</i> ( <i>F</i> <sup>2</sup> ) values ( <i>I</i> > 2 $\sigma$ ( <i>I</i> )) | 0.0913          | 0.1362         |
| Final <i>R</i> <sub>1</sub> values (all data)                                           | 0.0378          | 0.0623         |
| Final w <i>R</i> ( <i>F</i> <sup>2</sup> ) values (all data)                            | 0.0930          | 0.1531         |
| Goodness of fit on <i>F</i> <sup>2</sup>                                                | 1.042           | 1.0572         |
| CCDC number                                                                             | 1022936         | 1040719        |

4. Sol-gel transition temperature.

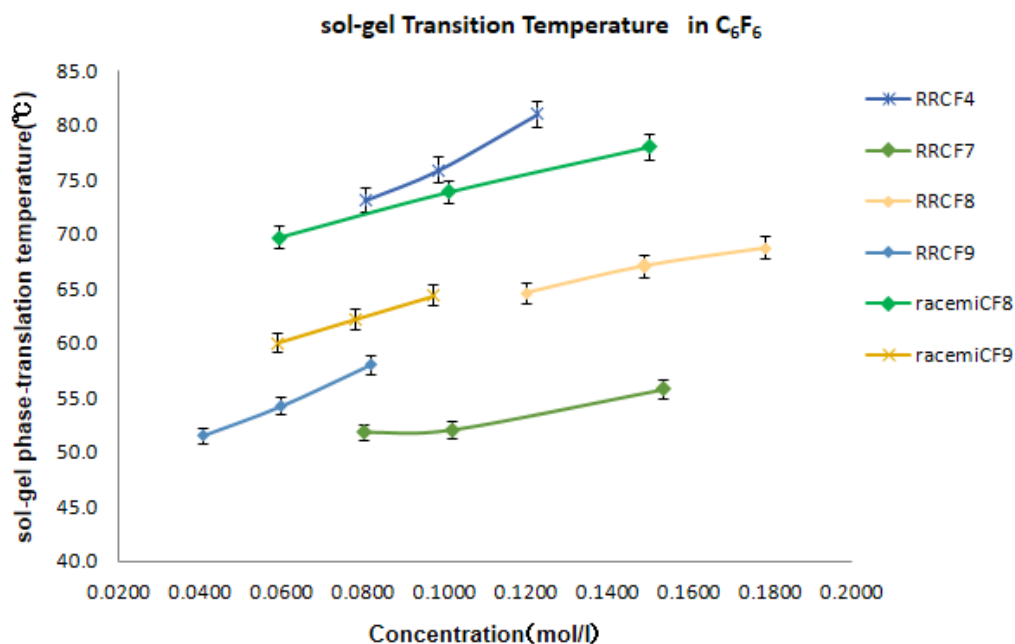

Fig. S4-1 Sol-gel transition temperature of *RR*-CF4, *RR*-CF7, *RR*-CF8, *RR*-CF9, racemic-CF8, racemic-CF9 in  $C_6F_6$ .

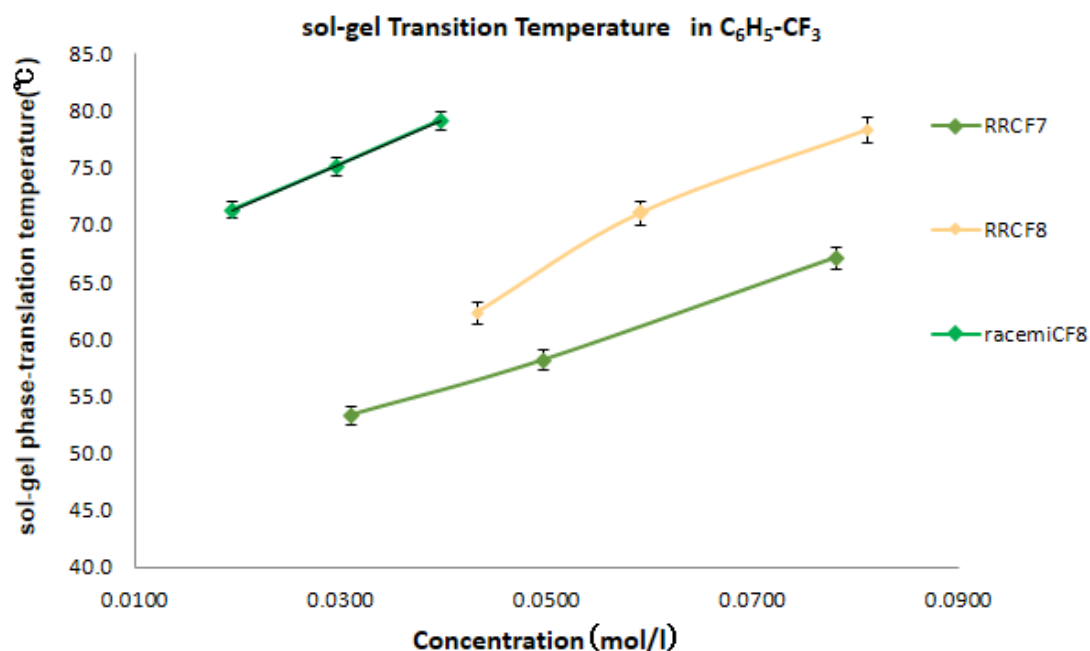

Fig. S4-2 Sol-gel transition temperature of *RR*-CF7, *RR*-CF8, racemic-CF8 in  $C_6H_5-CF_3$ .

5. The effect of optical purity on sol-gel temperature (CF8).

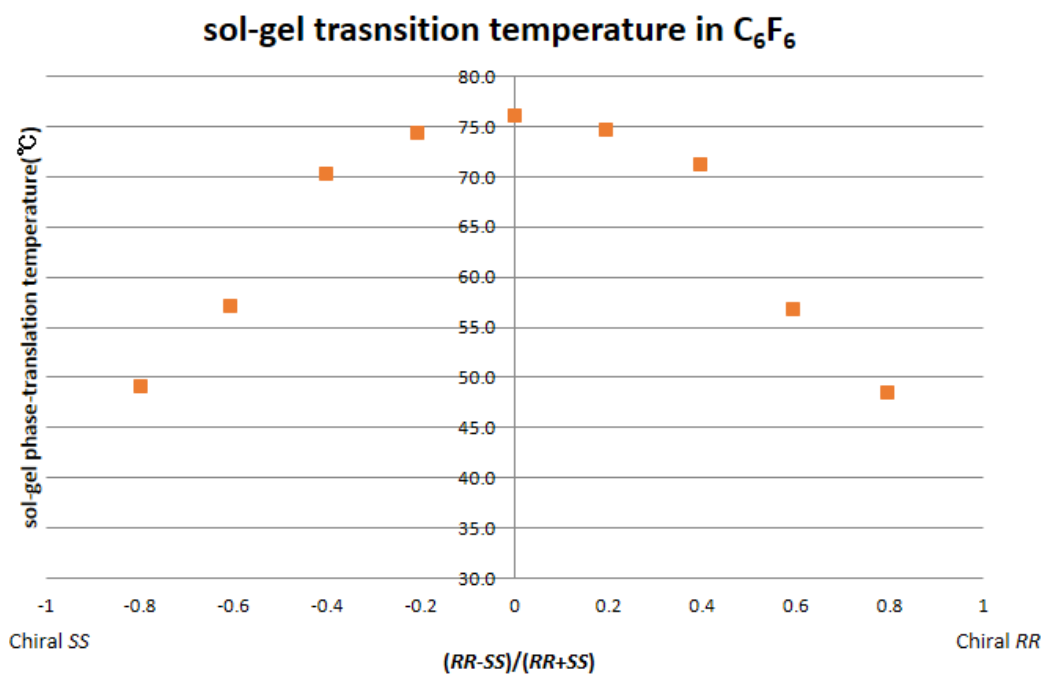

Fig. S5 The dependence of sol-gel transition temperature on the enantiomeric excess of **CF8** in C<sub>6</sub>F<sub>6</sub>.



6. Photographs of the inversion tests of the gels.

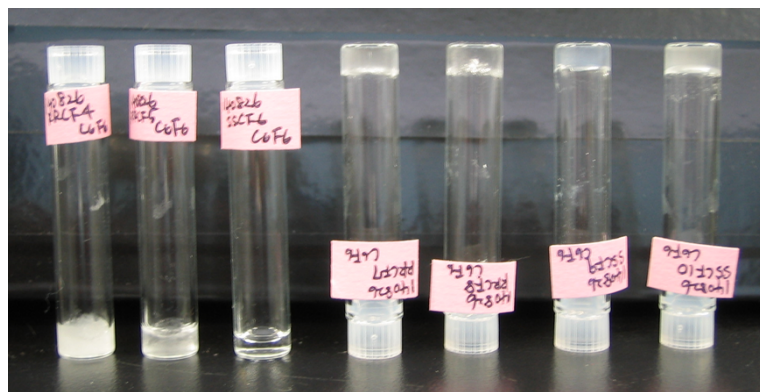

Fig. 6-1 Photographs of *RR*-**CFn** in  $C_6F_6$ . ( $n = 4$  to 10 from left to right).

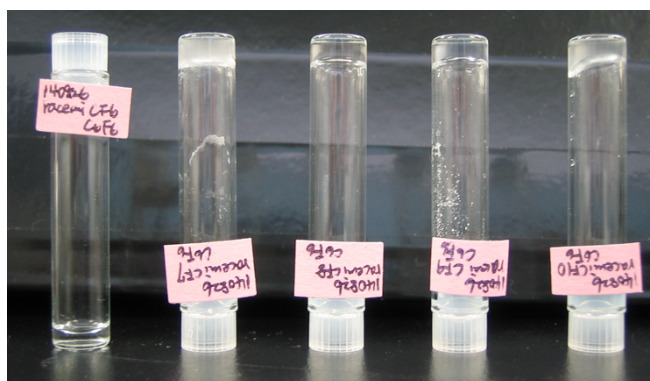

Fig. 6-2 Photographs of racemic-**CFn** in  $C_6F_6$ . ( $n = 6$  to 10 from left to right).

7. HPLC Chart of gelators.

The optical purity of the gelators were determined by chiral HPLC on a Daicel AD-H column. (*n*-hexane/isopropanol = 96/4, flow rate = 0.2 mL/min)

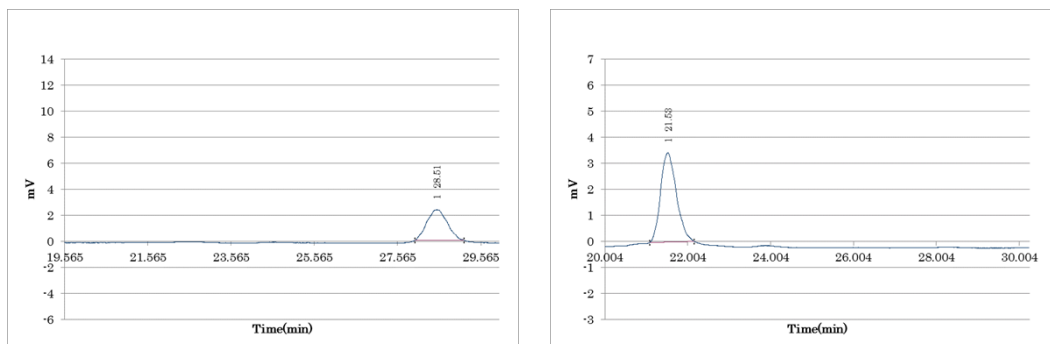

Fig. 7-1 HPLC chart of *RR*-CF4 (left) and *SS*-CF4 (right).

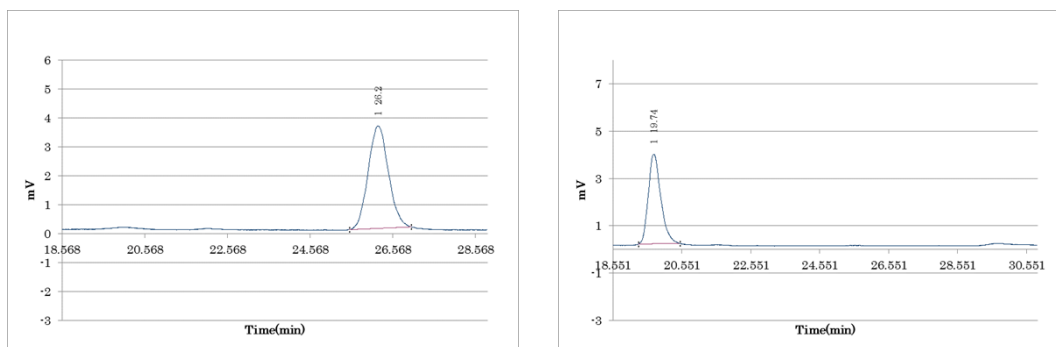

Fig. 7-2 HPLC chart of *RR*-CF5 (left) and *SS*-CF5 (right).

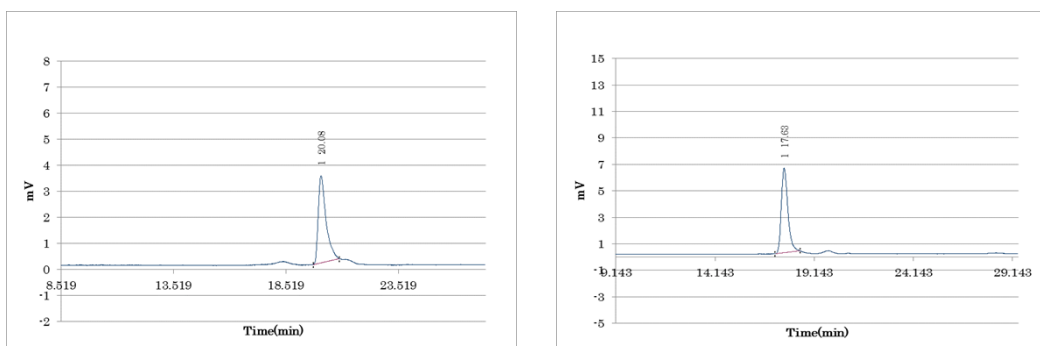

Fig. 7-3 HPLC chart of *RR*-CF6 (left) and *SS*-CF6 (right).

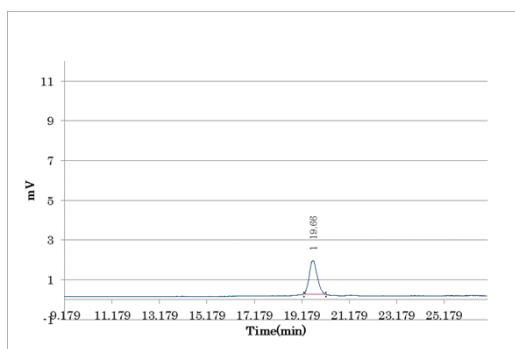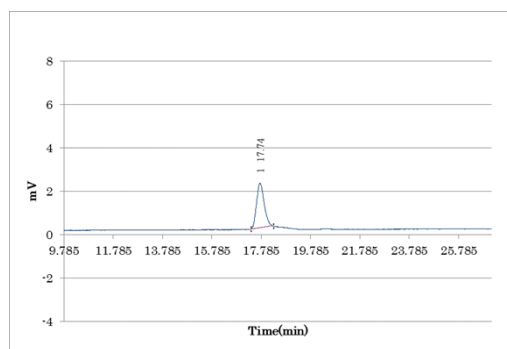

Fig. 7-4 HPLC chart of *RR*-CF7 (left) and *SS*-CF7 (right).

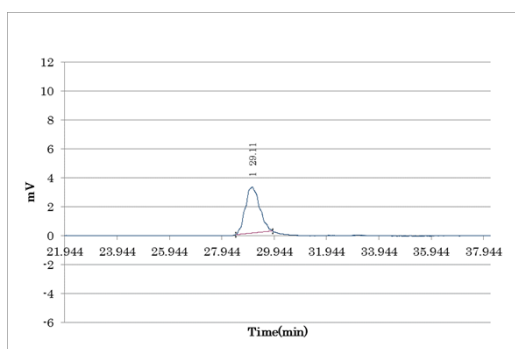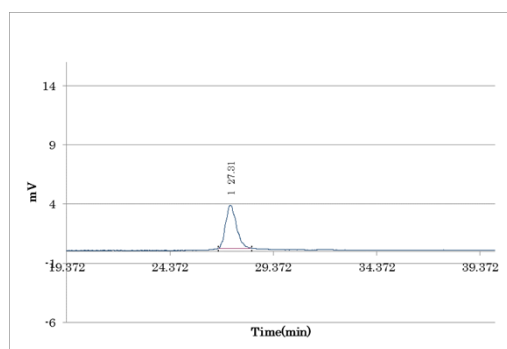

Fig. 7-5 HPLC chart of *RR*-CF8 (left) and *SS*-CF8 (right).

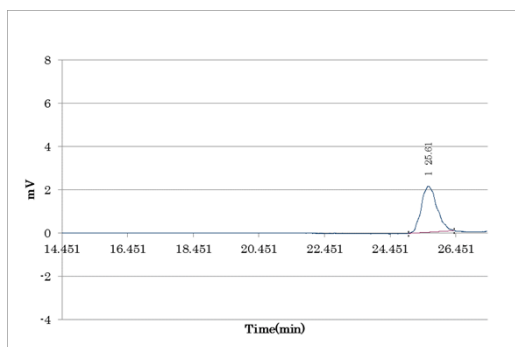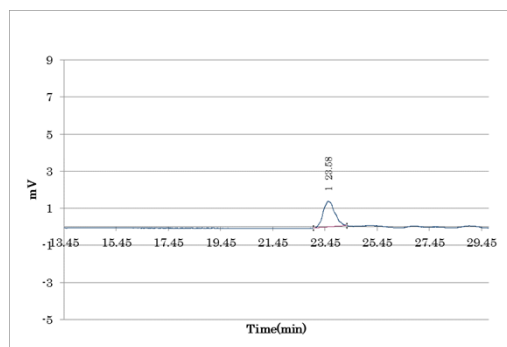

Fig. 7-6 HPLC chart of *RR*-CF9 (left) and *SS*-CF9 (right).

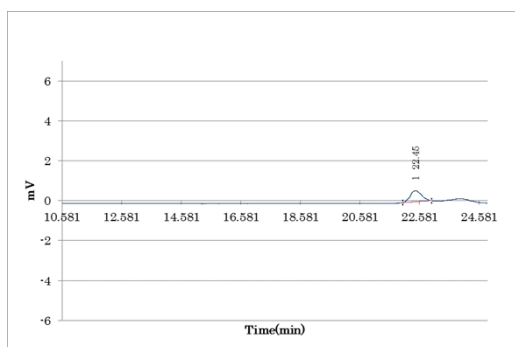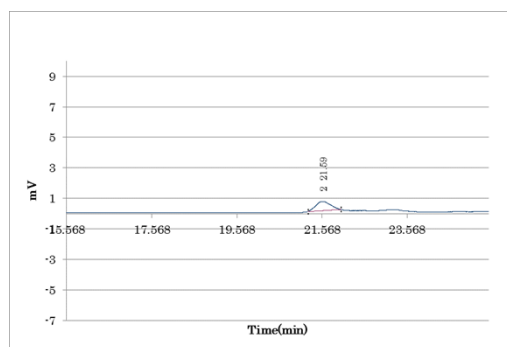

Fig. 7-7 HPLC chart of *RR*-CF10 (left) and *SS*-CF10 (right).
